# Multivoxel codes for representing and integrating acoustic features in human cortex

Ediz Sohoglu<sup>1\*</sup>, Sukhbinder Kumar<sup>2,3</sup>, Maria Chait<sup>1</sup> and Timothy D.  
Griffiths<sup>2,3</sup>

<sup>1</sup>Ear Institute, University College London, 332 Gray's Inn Road, London  
WC1X 8EE, United Kingdom

<sup>2</sup>Institute of Neuroscience, Medical School, Newcastle University, Newcastle  
upon Tyne, NE2 4HH, United Kingdom

<sup>3</sup>Wellcome Trust Centre for Human Neuroimaging, University College London,  
London, WC1N 3BG, United Kingdom

**Abbreviated title: Multivoxel codes for acoustic features**

**Keywords:** auditory cortex; parietal cortex; fMRI; multivariate; feature binding

**Acknowledgements:** We are grateful to Carsten Allefeld for advice with  
crossvalidated MANOVA.

**\*Address correspondence to:** Ediz Sohoglu ([e.sohoglu@gmail.com](mailto:e.sohoglu@gmail.com)).

Current address: MRC Cognition and Brain Sciences Unit, University of  
Cambridge, 15 Chaucer Road, Cambridge, CB2 7EF, United Kingdom

Number of figures: 5

Number of tables: 1

Number of pages: 37 (with figures embedded)

Number of words for Abstract, Introduction and Discussion: 153, 640, 1476

29

## Abstract

30 Using fMRI and multivariate pattern analysis, we determined whether acoustic  
31 features are represented by independent or integrated neural codes in human  
32 cortex. Male and female listeners heard band-pass noise varying  
33 simultaneously in spectral (frequency) and temporal (amplitude-modulation  
34 [AM] rate) features. In the superior temporal plane, changes in multivoxel  
35 activity due to frequency were largely invariant with respect to AM rate (and  
36 vice versa), consistent with an independent representation. In contrast, in  
37 posterior parietal cortex, neural representation was exclusively integrated and  
38 tuned to specific conjunctions of frequency and AM features. Direct between-  
39 region comparisons show that whereas independent coding of frequency and  
40 AM weakened with increasing levels of the hierarchy, integrated coding  
41 strengthened at the transition between non-core and parietal cortex. Our  
42 findings support the notion that primary auditory cortex can represent  
43 component acoustic features in an independent fashion and suggest a role for  
44 parietal cortex in feature integration and the structuring of acoustic input.

45

46

## Significance statement

47 A major goal for neuroscience is discovering the sensory features to which the  
48 brain is tuned and how those features are integrated into cohesive perception.

49 We used whole-brain human fMRI and a statistical modeling approach to  
50 quantify the extent to which sound features are represented separately or in  
51 an integrated fashion in cortical activity patterns. We show that frequency and  
52 AM rate, two acoustic features that are fundamental to characterizing  
53 biological important sounds such as speech, are represented separately in  
54 primary auditory cortex but in an integrated fashion in parietal cortex. These  
55 findings suggest that representations in primary auditory cortex can be  
56 simpler than previously thought and also implicate a role for parietal cortex in  
57 integrating features for coherent perception.

58

59

60

61

## Introduction

62

63 In structuring the auditory scene, the brain must carry out two  
64 fundamental computations. First, it must derive *independent* representations  
65 of component acoustic features so that task-relevant features can be  
66 prioritized and task-irrelevant ones ignored. Second, to solve the well-known  
67 “binding problem”, the brain must subsequently *integrate* these separated  
68 representations into a coherent whole so that the features of a relevant sound  
69 source can be tracked successfully in cluttered scenes. Whether  
70 representations of stimulus features are independent or integrated is a  
71 longstanding issue in psychology (Treisman and Gelade, 1980; Ashby and  
72 Townsend, 1986) and neuroscience (Di Lollo, 2012; Soto et al., 2018). Even  
73 when not explicitly framed using these terms, many questions concerning  
74 sensory systems can be formalized in terms of representational independence  
75 versus integration (Soto et al., 2018).

75

76 It is widely believed that auditory processing is hierarchically organized  
77 and that neural representations are progressively transformed from  
78 independent to integrated codes as sensory information ascends the auditory  
79 pathway (Rauschecker and Tian, 2000; Bizley and Cohen, 2013). Thus, while  
80 neurons in low-level regions might respond to single stimulus features, higher-  
81 level neurons should show more complex tuning properties and respond to  
82 conjunctions of features. Precisely where along this continuum human primary  
83 auditory cortex (and regions beyond) fit within this conception of the auditory  
84 system has been the subject of debate.

84

85 Based on presumed similarities with the visual system, early models  
86 proposed that representations in primary auditory cortex were primarily  
87 independent, instantiated as topographically organized “feature maps” (see  
88 Nelken et al., 2003). According to such accounts, the integration of features is  
89 a computation that should most reliably be observed in non-primary regions.  
90 However, animal physiology studies demonstrate highly non-linear neural  
91 responses already at the level of primary auditory cortex, suggestive of an  
92 integrated coding scheme (deCharms et al., 1998; Nelken et al., 2003; Chi et  
93 al., 2005; Wang et al., 2005; Christianson et al., 2008; Atencio et al., 2009;  
Bizley et al., 2009; Sadagopan and Wang, 2009; Sloas et al., 2016). The

94 extent to which this also applies in humans remains unclear. While there are  
95 many sources of human imaging evidence that are potentially relevant to this  
96 issue, particularly investigations of how low-level acoustic features and  
97 higher-level categories are represented in cortical activity (Davis and  
98 Johnsruide, 2003; Zatorre et al., 2004; Cusack, 2005; Kumar et al., 2007;  
99 Staeren et al., 2009; Leaver and Rauschecker, 2010; Teki et al., 2011;  
100 Giordano et al., 2013; Norman-Haignere et al., 2015; Overath et al., 2015;  
101 Allen et al., 2017), fewer studies have directly tested and quantified the extent  
102 of representational independence versus integration in human cortex.

103 In the current study, we used fMRI and multivariate pattern analysis to  
104 determine the extent to which acoustic features are represented by  
105 independent or integrated multivoxel codes and how those codes are  
106 expressed over the human cortical hierarchy. In general, multivariate  
107 approaches allow sensory features to be more directly linked to their  
108 representation in neural response patterns (Tong and Pratte, 2012;  
109 Kriegeskorte and Kievit, 2013; Haynes, 2015), in contrast to traditional  
110 univariate analysis of overall regional differences in signal amplitude. In this  
111 study, an approach based on MANOVA (Allefeld and Haynes, 2014) allowed  
112 us to estimate the contribution of single acoustic features to the observed  
113 multivoxel patterns (reflecting independent coding), as opposed to non-linear  
114 interactions between the features that may arise at the level of object  
115 perception (integrated coding). Moreover, by acquiring whole-brain fMRI, we  
116 were able to characterize neural representations simultaneously across the  
117 entire human cortex, in contrast to more localized physiological recordings in  
118 animals.

119 Participants listened to band-pass noise varying simultaneously in  
120 frequency (a spectrally-based feature) and amplitude modulation (AM) rate  
121 (temporally-based; see Figure 1A). We chose to investigate these two  
122 acoustic features as they are sufficient alone to characterize much of the  
123 information present in biologically important sounds such as speech (Shannon  
124 et al., 1995; Roberts et al., 2011).

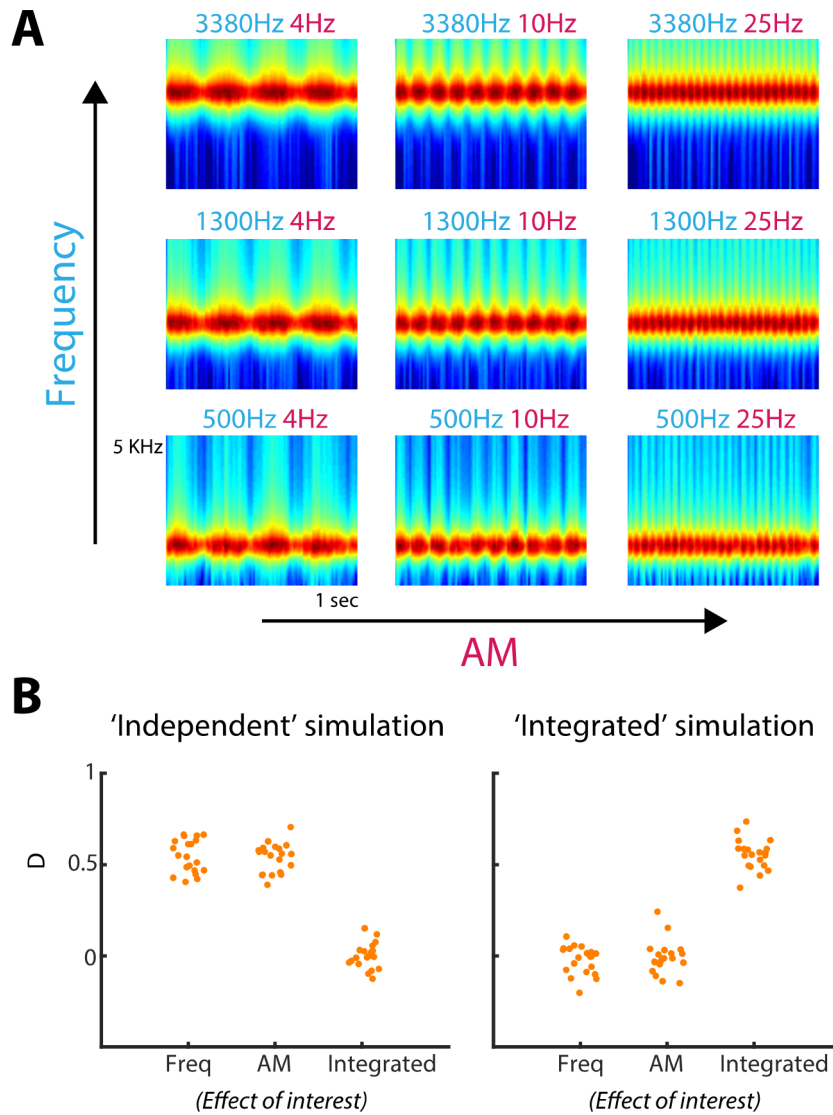

**Figure 1.** A) Spectrograms of the nine stimuli, equally spaced on a scale of ERB-rate (Moore and Glasberg, 1983) and smoothed to obtain a temporal resolution similar to the Equivalent Rectangular Duration (Plack and Moore, 1990). The cyan- and magenta-colored text above each spectrogram indicate the center carrier frequency and AM rate of the bandpass noise, respectively. B) Multivariate pattern distinctness estimates for each effect of interest, when activity patterns were simulated using an independent representation (left-side graph) or an integrated representation (right-side graph). Each data point represents the pattern distinctness for a single iteration (“participant”) of the simulation. Freq, Frequency. D, Pattern distinctness.

125

## Methods

### 126 Participants

127 Twenty participants (eleven female), aged between 18 and 27 years  
128 (mean = 23, SD = 2.4), were tested after being informed of the study’s  
129 procedure, which was approved by the research ethics committee of  
130 University College London. All reported normal hearing, normal or corrected-  
131 to-normal vision, and had no history of neurological disorders.

## 132 **Stimuli**

133           The stimulus consisted of narrow (third of an octave) bandpass noise,  
134 amplitude modulated sinusoidally with 80% depth (see Figure 1A). Each sound  
135 was presented for one second and varied across trials in center carrier  
136 frequency (from hereon, “frequency”) and amplitude modulation rate (“AM”).  
137 Frequency (500, 1300 and 3380 Hz) and AM (4, 10 and 25 Hz) were equally  
138 spaced on a logarithmic scale. Importantly for the purpose of assessing  
139 independent and integrated feature coding (see First-level statistics section  
140 below), frequency and AM varied simultaneously and in an orthogonal fashion,  
141 such that every frequency was paired with every AM (i.e. nine stimuli in total,  
142 arranged as a 3 x 3 factorial design). The relatively slow AM rates precluded  
143 the perception of pitch associated with the temporal modulation. In addition, the  
144 carrier center frequencies and bandwidths were chosen to avoid detectable  
145 spectral cues from resolved sidebands in the stimulus (Moore, 2003).

146           Stimuli were matched in terms of their RMS amplitude and shaped with  
147 20 ms raised-cosine onset and offset ramps. Bandpass noise was synthesized  
148 independently on each presentation (with a sampling rate of 44100 Hz) and  
149 delivered diotically through MRI-compatible insert earphones (S14,  
150 Sensimetrics Corporation). To compensate for resonances in the frequency  
151 response of the earphones, the stimuli were digitally preprocessed using the  
152 filters and software provided with the earphones.

## 153 **Procedure**

154           Stimulus delivery was controlled with Cogent toolbox  
155 (<http://www.vislab.ucl.ac.uk/cogent>) in Matlab (MathWorks). Participants were  
156 scanned for five runs, each lasting around ten minutes consisting of sixteen  
157 repetitions of the nine stimuli. For one participant, there was insufficient time to  
158 scan for the fifth run because of technical difficulties. Stimuli were grouped into  
159 blocks of eighteen sounds within which all nine stimuli appeared twice and in  
160 random order. The inter-stimulus interval ranged uniformly between 2000 and  
161 4000 ms.

162           Participants were instructed to listen carefully to the sounds while  
163 looking at a central fixation cross and press a button (with their right hand) each

164 time a brief (150 ms duration) white-noise interruption occurred during sound  
165 presentation. These white-noise interruptions were unmodulated in their  
166 amplitude profile and occurred on a small percentage (~6%) of stimuli (once  
167 every block of eighteen sounds). Group performance was near ceiling,  
168 confirming engagement with the task. The average hit rate was .98 (ranging  
169 from .8 to 1 across participants; SEM = .014) with no false alarms.

170 To estimate the perceived saliency of the sounds, two participants from  
171 the main fMRI experiment and four new participants (two female; mean age =  
172 29 years, SD = 4) completed a short behavioral session similar in procedure to  
173 Petsas et al. (2016). These participants listened to all pairwise combinations of  
174 the nine sounds (eight pairs for each of the nine sounds; separated by 200 ms  
175 of silence) and were asked to judge on each trial which of the two sounds was  
176 more salient. Pairs were presented three times in random order, with the order  
177 of the sounds within a pair counterbalanced across trials.

178 To estimate perceived loudness, we used the loudness model of Moore  
179 et al. (2016), as implemented in Matlab  
180 (<http://hearing.psychol.cam.ac.uk/TVLBIN/tv2016Matlab.zip>). As the model  
181 output differs slightly for different noise samples of the same condition, we  
182 generated an entire (single-participant) stimulus set in the same way as was  
183 done for the main experiment and submitted each stimulus to the model. We  
184 computed the time-varying long-term loudness, averaged over the duration of  
185 the stimulus and across noise samples within each of the nine stimuli.

## 186 **Image acquisition**

187 Imaging data were collected on a Siemens 3 Tesla Quattro MRI  
188 scanner (<http://www.siemens.com>) at the Wellcome Trust Centre for Human  
189 NeuroImaging, University College London. A total of 175 echo planar imaging  
190 (EPI) volumes were acquired per run, using a 32-channel head coil and  
191 continuous sequence (TR = 3.36 sec; TE = 30 ms; 48 slices covering the  
192 whole brain; 3 mm isotropic resolution; matrix size = 64 x 74; echo spacing =  
193 0.5 ms; orientation = transverse). After the third run, field maps were acquired  
194 (short TE = 10 ms; long TE = 12.46 ms). During the functional scans, we also



195 obtained physiological measures of each participant's breathing and cardiac  
196 pulse. Because of technical issues, physiological measures were not available  
197 for two participants. The experimental session concluded with the acquisition  
198 of a high-resolution (1 x 1 x 1 mm) T1-weighted structural MRI scan.

## 199 **Image processing**

200 fMRI analysis was performed in SPM12  
201 (<http://www.fil.ion.ucl.ac.uk/spm>). After discarding the first three volumes to  
202 allow for magnetic saturation effects, the remaining images were realigned  
203 and unwarped to the first volume to correct for movement of participants  
204 during scanning. Also at the unwarping stage, the acquired field maps were  
205 used to correct for geometric distortions in the EPI due to magnetic field  
206 variations. Realigned images were co-registered to the mean functional image  
207 and then subjected to multivariate statistical analysis, generating searchlight  
208 maps from unsmoothed data in each participant's native space (see First-level  
209 statistics section below). Searchlight maps were subsequently normalized to  
210 the Montreal Neurological Institute (MNI) template image using the  
211 parameters from the segmentation of the structural image (resampled  
212 resolution: 2 x 2 x 2 mm) and smoothed with a Gaussian kernel of 6 mm full-  
213 width at half-maximum. Where additional univariate analyses are reported,  
214 realigned images were spatially normalized and smoothed first before  
215 statistical analysis.

## 216 **First-level statistics**

217 Statistical analysis was based on the general linear model (GLM) of  
218 each participant's fMRI time series, using a 1/128 Hz highpass filter and AR1  
219 correction for auto-correlation. The design matrix comprised the auditory  
220 stimulus events, each modeled as a stick (delta) function and convolved with  
221 the canonical haemodynamic response function. Separate columns were  
222 specified for each of the nine stimuli, in addition to a column for target sounds  
223 (to remove variance associated with the white noise interruptions and the  
224 button presses). Additional columns were specified for the six movement  
225 parameters and the mean of each run. Cardiac and respiratory phase

226 (including their aliased harmonics) as well as heart rate and respiratory  
227 volume were modeled using an in-house Matlab toolbox (Hutton et al., 2011).  
228 This resulted in fourteen physiological regressors in total: six each for cardiac  
229 and respiratory phase and one each for heart rate and respiratory volume.

230 For statistical inference, we used cross-validated multivariate analysis  
231 of variance (Allefeld and Haynes, 2014), as implemented in the cvMANOVA  
232 toolbox in Matlab (version 3; <https://github.com/allefeld/cvmanova>). For each  
233 participant this method measures the pattern distinctness  $D$ , a cross-validated  
234 version of one of the standard multivariate statistics: Lawley-Hotelling's trace.  
235  $D$  quantifies the multivoxel variation in activity attributable to an experimental  
236 contrast, relative to unexplained variation or noise (for examples of previous  
237 applications, see Guggenmos et al., 2016; Christophel et al., 2017, 2018;  
238 Dijkstra et al., 2017). Thus,  $D$  is the multivariate extension of the univariate  $F$ -  
239 statistic in ANOVA and is a clearly interpretable measure of effect size. This is  
240 in contrast to classification accuracy from pattern decoders, which is  
241 dependent on the particular algorithm used as well as the amount of data and  
242 partitioning into training and test sets (see Allefeld and Haynes, 2014). Cross-  
243 validation ensures that the expected value of  $D$  is zero if two voxel patterns  
244 are not statistically different from each other, making  $D$  a suitable summary  
245 statistic for group-level inference (e.g. with the one-sample  $t$ -test). Note that  
246 because of this cross-validation,  $D$  can sometimes be negative if its true value  
247 is close to zero in the presence of noise.

248 When applied to the simple case of only two stimuli, the pattern  
249 distinctness  $D$  is a measure of between-stimulus pattern dissimilarity and is  
250 closely related to the (cross-validated) Mahalanobis distance, which is argued  
251 to be a more reliable and accurate metric for characterizing multivoxel  
252 patterns than the correlation or Euclidean distance (Kriegeskorte et al., 2006;  
253 Ejaz et al., 2015; Walther et al., 2016). Like the Mahalanobis distance,  $D$   
254 takes into account the spatial structure of the noise (GLM residuals) by  
255 normalizing the multivoxel variation for an experimental effect by the noise  
256 covariance between voxels. As  $D$  is obtained from the GLM, cvMANOVA can  
257 also be used to test more complex contrasts such as main effects and

258 interactions with a factorial design. As explained below, we can use such  
259 factorial contrasts to distinguish between independent and integrated neural  
260 coding.

261 cvMANOVA was performed as a searchlight analysis (Kriegeskorte et  
262 al., 2006) using spheres with a radius of three voxels (~9 mm; ~123 voxels of  
263 3 x 3 x 3 mm) and constrained to voxels within the whole-brain mask  
264 generated by SPM during model estimation. Thus, for each participant and  
265 effect of interest, a whole-brain searchlight image was generated in which  
266 each voxel expressed the pattern distinctness  $D$  over that voxel and the  
267 surrounding neighborhood. As recommended by Allefeld and Haynes (Allefeld  
268 and Haynes, 2014), to correct for searchlight spheres near the brain mask  
269 boundaries containing fewer voxels, the estimate of  $D$  at each voxel was  
270 standardized by dividing by the square root of the number of voxels within the  
271 searchlight.

272 We tested the extent to which frequency and AM features are  
273 represented by independent or integrated neural codes by examining three  
274 effects of interest. If frequency and AM features are represented in an  
275 integrated fashion, then changes in these two features should combine non-  
276 linearly (non-additively) to influence multivoxel activity patterns (see  
277 Kornysheva and Diedrichsen, 2014; Erez et al., 2015). In other words, the  
278 effect of frequency should differ depending on AM (and vice versa). Thus, the  
279 first effect of interest was the interaction between frequency and AM and  
280 quantified the extent of integrated coding. If on the other hand, frequency and  
281 AM features are coded independently, then changes in these two features  
282 should result in a linear (additive) effect on activity patterns. An independent  
283 effect implies that changes in voxel patterns attributable to the frequency  
284 feature remain invariant with respect to AM (and vice versa): there is no  
285 interaction. Within the cvMANOVA framework, the extent of independence  
286 can be quantified by subtracting the interaction from the main effects  
287 (following equation 19 in Allefeld and Haynes 2014), resulting in the two other  
288 effects of interest: Independent coding of frequency and Independent coding  
289 of AM. These measures of independent coding are equivalent to those

290 obtained from “cross-decoding” in classifier-based multivoxel pattern analysis  
291 (Formisano et al., 2008; Allefeld and Haynes, 2014; Kornysheva and  
292 Diedrichsen, 2014; Simanova et al., 2014).

293 Computational simulations confirm that the above effects of interest  
294 can successfully detect the presence of independent and integrated  
295 representations. For each of twenty “participants”, five “runs” and nine stimuli,  
296 we generated synthetic activity patterns over 123 voxels consisting of the true  
297 underlying pattern (normal random vector) added to some noise (signal-to-  
298 noise ratio set to 0.1). Within one run, there were sixteen repetitions of the  
299 nine stimuli. These synthetic data were then submitted to cvMANOVA  
300 resulting in a pattern distinctness estimate for each participant and effect of  
301 interest.

302 Two versions of the simulation were run, following Kornysheva and  
303 Diedrichsen (2014). In the first version, frequency and AM features were  
304 represented independently. That is, voxel patterns were generated separately  
305 for the two features and summed together to obtain voxel patterns ( $Y$ ) for  
306 each of the nine stimuli with carrier center frequency  $f$  and AM rate  $m$ :

$$307 \quad Y_{f,m} = F_f + T_m + e_{f,m}$$

308 where  $F$  and  $T$  denote, respectively, the voxel pattern representations for the  
309 frequency and AM features and  $e$  the noise.

310 In the second version, frequency and AM were represented in an  
311 integrated fashion by generating a unique pattern for each of the nine stimuli.  
312 Thus, in this version of the simulation, the representation of frequency is  
313 inseparable from that of AM:

$$314 \quad Y_{f,m} = FT_{f,m} + e_{f,m}$$

315 Here  $FT$  denotes the true pattern that was generated uniquely for each  
316 condition. In both versions, the resulting patterns were scaled to have the  
317 same mean and variance.

318 As Figure 1B shows, when frequency and AM were simulated as

319 independent representations, the pattern distinctness  $D$  was significantly  
320 greater than zero when testing the independent (but not integrated) coding  
321 effects of interest (frequency:  $t(19) = 29.2$ ,  $p < .001$ ; AM:  $t(19) = 35.1$ ,  $p <$   
322  $.001$ ; Integrated:  $t(19) = -.104$ ,  $p = .541$ ). In contrast, when frequency and AM  
323 were represented in an integrated fashion, the reverse was true with a  
324 significant effect of integrated (but not independent) coding (frequency:  $t(19) =$   
325  $-1.39$ ,  $p = .910$ ; AM:  $t(19) = -.429$ ,  $p = .664$ ; Integrated:  $t(19) = 33.0$ ,  $p < .001$ ).

## 326 **Group-level statistics**

327 Searchlight images were submitted to a group-level one-sample t-test  
328 under minimal assumptions using a nonparametric permutation procedure, as  
329 implemented in SnPM (<http://warwick.ac.uk/snpm>). We used 5000 iterations  
330 with 6 mm of variance smoothing (Nichols and Holmes, 2002) and  
331 constrained the analysis to voxels within the cortex (as defined by the  
332 probabilistic Harvard-Oxford cortical mask thresholded at 25%, distributed  
333 with FslView <https://fsl.fmrib.ox.ac.uk>). Statistical maps were thresholded  
334 voxelwise at  $p < .005$  and clusterwise at  $p < .05$  (familywise error [FWE]  
335 corrected for multiple comparisons).

336 Additional region of interest (ROI) analyses within the superior  
337 temporal plane were carried out in regions anatomically defined by the Jülich  
338 and Harvard-Oxford probabilistic atlases (distributed with FslView) and  
339 thresholded at 30%. These included primary auditory cortex (area Te1.0 in  
340 middle Heschl's gyrus [HG]) and the non-primary auditory areas Te1.1  
341 (posteromedial HG), Te1.2 (anterolateral HG), planum polare (PP) and  
342 planum temporale (PT). We also tested the posterior parietal region revealed  
343 in the whole-cortex SnPM analysis, to enable a comparison of effect size with  
344 the auditory cortical ROIs and to statistically test for between-region  
345 differences. To avoid statistical "double-dipping" (Kriegeskorte et al., 2009),  
346 we used a leave-one-subject-out procedure (Esterman et al., 2010) in which  
347 the whole-cortex second level t-test was repeatedly re-estimated, each time  
348 leaving out one participant, and using the resulting left parietal cluster as the  
349 ROI for the left out subject (cluster defining threshold  $p < .005$  uncorrected).  
350 To obtain the homologous cluster in the right hemisphere, each left parietal

351 cluster was left-right flipped using MarsBaR toolbox for SPM  
352 (<http://marsbar.sourceforge.net>). To reduce computation time, these leave-  
353 one-subject-out t-tests were conducted parametrically in SPM (i.e. without the  
354 SnPM toolbox). ROI effect sizes were computed by averaging the searchlight  
355 image over the spatial extent of each ROI. To facilitate interpretation (Allefeld  
356 and Haynes, 2014), ROI effect sizes are reported after transforming the  
357 standardized pattern distinctness back into the original estimate (by  
358 multiplying by a constant factor of  $\sqrt{123}$  i.e. the typical number of voxels  
359 within each searchlight).

360 Classical multidimensional scaling (MDS) was performed on the  
361 average dissimilarity matrix in selected ROIs, formed by computing the  
362 pattern distinctness between all stimuli. Prior to MDS, each element in the  
363 dissimilarity matrices was subjected to a group-level one-sample t-test. Given  
364 that the goal of this analysis was to better visualize effects of interest already  
365 identified as significant (i.e. the independent and integrated contrasts in the  
366 whole-cortex and ROI analyses), we thresholded these dissimilarity matrices  
367 at  $p < .05$  uncorrected.

368

### 369 **Spatial resolution of current fMRI data and relationship with** 370 **previous mapping studies**

371 Because we wished to measure whole-brain responses, including in  
372 regions outside classically defined auditory cortex, we measured BOLD  
373 responses with a resolution of 3 mm isotropic voxels (the data were  
374 additionally smoothed with a 6 mm kernel but only after the critical multivariate  
375 statistics were computed). While finer-resolution data are commonly obtained  
376 in studies investigating how frequency and other acoustic features are  
377 mapped to individual voxels (e.g. Formisano et al., 2003; Barton et al., 2012;  
378 Herdener et al., 2013; Leaver and Rauschecker, 2016), our concern here is  
379 how frequency and AM features are represented at a more abstract level in  
380 activity patterns over multiple voxels. Such representations may reflect both  
381 “distributed” and “sparse” coding schemes (Bizley and Cohen, 2013). It is  
382 well-established that multivoxel methods can sensitively measure changes in  
383 brain responses to acoustic features (even with standard-resolution data) by

384 pooling weak but consistent signals over voxels and exploiting between-voxel  
385 correlations (e.g. Linke and Cusack, 2015).

386 Note that while significant independent coding of frequency and AM  
387 might be consistent with separate underlying neural populations responding to  
388 those features, this need not be the case. That is, the same neurons could  
389 simply be responding in a linear (additive) fashion to changes in frequency  
390 and AM rate. Thus, the extent of representational independence and  
391 integration in multivoxel patterns reveals more abstract computational  
392 properties (rather than the precise spatial configuration) of neural populations  
393 in a cortical region.

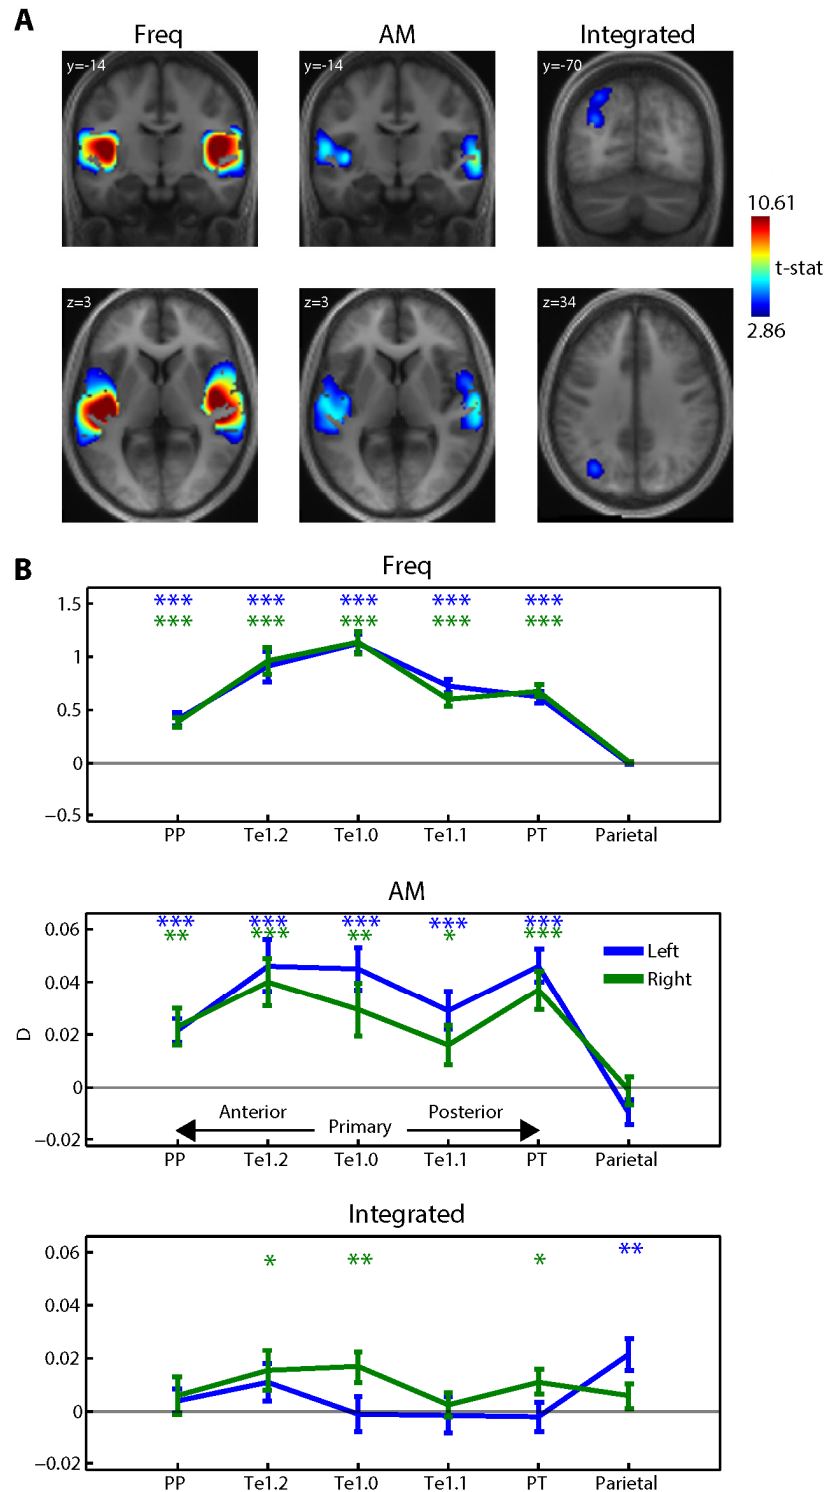

**Figure 2.** Whole-cortex multivariate searchlight analysis. A) Group-level statistical maps for each effect of interest, overlaid onto coronal and axial sections of the group-averaged structural (in MNI space) and thresholded voxelwise at  $p < .005$  and clusterwise at  $p < .05$  (FWE corrected for multiple comparisons). B) ROI analysis. Each data point shows the pattern distinctness  $D$ , averaged over the searchlight map within each ROI and over participants. Error bars represent the standard error of the mean. Asterisk symbols above each data point indicate significantly above-zero pattern distinctness, FDR corrected for multiple comparisons across contrasts, ROIs and hemispheres. \*\*\*  $p < .001$ , \*\*  $p < .01$ , \*  $p < .05$ .



| Effect of Interest | Hemisphere | Region Label              | Extent | t-value | x   | y   | z  |
|--------------------|------------|---------------------------|--------|---------|-----|-----|----|
| Frequency          | Left       | Heschl's Gyrus            | 6056   | 14.2923 | -44 | -22 | 6  |
|                    |            | Superior Temporal Gyrus   |        | 13.1983 | -48 | -26 | -2 |
|                    |            | Supramarginal Gyrus       |        | 6.2306  | -54 | -44 | 12 |
|                    | Right      | Central Opercular Cortex  | 5987   | 14.0351 | 50  | -20 | 14 |
|                    |            | Superior Temporal Gyrus   |        | 12.1458 | 50  | -22 | 0  |
|                    |            | Superior Temporal Gyrus   |        | 8.3851  | 58  | -6  | -4 |
| AM                 | Left       | Parietal Operculum Cortex | 2721   | 7.9246  | -50 | -30 | 14 |
|                    |            | Insular Cortex            |        | 5.8524  | -42 | -14 | 0  |
|                    |            | Superior Temporal Gyrus   |        | 5.1419  | -52 | -36 | 6  |
|                    | Right      | Superior Temporal Gyrus   | 2384   | 7.0587  | 62  | -14 | -2 |
|                    |            | Superior Temporal Gyrus   |        | 5.7386  | 62  | -28 | 8  |
|                    |            | Inferior Frontal Gyrus    |        | 3.3739  | 56  | 12  | 10 |
| Integrated         | Left       | Inferior Parietal Lobule  | 445    | 4.5942  | -32 | -68 | 32 |
|                    |            | Superior Parietal Lobule  |        | 4.3273  | -28 | -72 | 50 |
| Saliency           | Left       | Superior Temporal Gyrus   | 5446   | 17.9633 | -52 | -30 | 8  |
|                    |            | Superior Temporal Gyrus   |        | 7.0212  | -58 | -10 | 0  |
|                    | Right      | Superior Temporal Gyrus   | 5409   | 14.9611 | 56  | -24 | 8  |
|                    |            | Temporal Pole             |        | 8.5181  | 56  | 0   | -2 |
|                    |            | Superior Temporal Gyrus   |        | 4.2615  | 50  | -44 | 28 |

394

395 **Table 1-** MNI coordinates and anatomical labels for significant multivariate searchlight effects

396

## Results

397

### 398 Cortical distribution of independent and integrated codes

399 We used cross-validated MANOVA (Allefeld and Haynes, 2014) to  
 400 determine the extent to which cortical activity patterns show evidence for 1)  
 401 independent coding of frequency, in which the influence of frequency was  
 402 invariant with respect to AM, 2) independent coding of AM, in which the  
 403 influence of AM was invariant with frequency or 3) integrated coding, in which  
 404 the influences of frequency and AM were interdependent. This was achieved  
 405 by testing whether the pattern distinctness  $D$  over a searchlight sphere or ROI  
 406 was significantly above zero for the independent and integrated effects of  
 407 interest (see First-level statistics in the Methods section).

408 Using a whole-cortex searchlight analysis (Kriegeskorte et al., 2006),  
 409 we detected large clusters in the superior temporal plane bilaterally (extending  
 410 into the superior temporal gyrus) that showed significant independent coding  
 411 of frequency and AM (Figure 2A and Table 1). Within these regions of

412 auditory cortex, there was no evidence for integrated coding after correcting  
413 for multiple comparisons over the whole cortex. Instead, significant integrated  
414 coding was observed in a cluster outside of classically defined auditory cortex  
415 in the left posterior parietal lobe, extending over the inferior and superior  
416 portions of the parietal lobule and the intraparietal sulcus.

417 We next conducted an ROI analysis in which independent and  
418 integrated coding was tested in anatomically defined regions in the superior  
419 temporal plane, including primary auditory cortex in middle HG (area Te1.0)  
420 as well as regions more anterior (Te1.2, PP) and posterior (Te1.1 and PT).  
421 This allowed us to make between-region comparisons and examine how the  
422 strength of independent and integrated codes changes with increasing levels  
423 of the cortical hierarchy. In addition to the anatomically defined auditory ROIs,  
424 we included the posterior parietal region identified in the whole-cortex  
425 searchlight analysis. To avoid statistical “double-dipping” (Kriegeskorte et al.,  
426 2009), this parietal region was functionally defined using a leave-one-subject-  
427 out procedure (Esterman et al., 2010).

428 We first tested each ROI separately, using false discovery rate (FDR)  
429 correction for multiple comparisons across 6 ROIs x 2 hemispheres x 3 effects  
430 of interest (Genovese et al., 2002). As expected from the earlier whole-cortex  
431 analysis, significant independent coding of both frequency and AM was  
432 observed in all auditory ROIs but not in posterior parietal cortex (shown in  
433 Figure 2B). The effect size for independent coding of AM (mean  $D = 0.02-0.04$   
434 over auditory regions) was relatively small, amounting to no more than 8% of  
435 the frequency effect size (mean  $D = 0.5-1.0$ ). Also expected was significant  
436 integrated coding in the left posterior parietal ROI. However, additional effects  
437 of integrated coding were observed in right primary auditory cortex (area  
438 Te1.0), right anterolateral auditory area Te1.2 and right PT. The effect size for  
439 integrated coding (mean  $D = 0.01-0.02$  over right Te1.0, Te1.2, PT and left  
440 parietal) was considerably smaller than that for independent coding (50% of  
441 the AM effect size and no more than 4% of the frequency effect size). Thus,  
442 this ROI analysis suggests that in sub-fields of auditory cortex, cortical  
443 activation patterns show a mixture of components: a strong independent code  
444 and a weak integrated code. In contrast in parietal cortex, only an integrated  
445 code is present.

446 Pairwise comparisons between left and right hemispheres revealed  
447 only one significant effect: an increase in frequency coding in left versus right  
448 auditory area Te1.1 (two-tailed pairwise  $t(19) = 2.55$ ,  $p < .025$ ). However, this  
449 did not survive FDR correction for multiple comparisons across regions.

450 We next assessed how the magnitude of independent and integrated  
451 coding changed along successive stages of the cortical hierarchy. For  
452 independent coding of frequency, there was a significant decrease in pattern  
453 distinctness in non-primary versus primary auditory cortex ( $t(19) = -12.2$ ,  $p <$   
454  $.001$ ; region x hemisphere interaction:  $t(19) = .427$ ,  $p = .674$ ). This was also  
455 the case for parietal versus non-primary auditory cortex ( $t(19) = -11.8$ ,  $p <$   
456  $.001$ ; region x hemisphere interaction:  $t(19) = -.612$ ,  $p = .548$ ). The pattern  
457 was less clear-cut for independent coding of AM and integrated coding. Like  
458 the results for the frequency feature, there was a significant decrease in  
459 independent coding of AM in parietal versus non-primary auditory cortex ( $t(19)$   
460  $= -5.38$ ,  $p < .001$ ; region x hemisphere interaction:  $t(19) = -1.89$ ,  $p = .075$ ).  
461 However, the equivalent comparison for non-primary versus primary auditory  
462 cortex was not significant ( $t(19) = -1.21$ ,  $p = .240$ ; region x hemisphere  
463 interaction:  $t(19) = -1.04$ ,  $p = .312$ ). For integrated coding, there was a (left-  
464 lateralized) increase in parietal versus non-primary auditory cortex (left  
465 hemisphere:  $t(19) = 2.94$ ,  $p < .01$ ; right hemisphere:  $t(19) = -.539$ ,  $p = .596$ ;  
466 region x hemisphere interaction:  $t(19) = 2.72$ ,  $p < .025$ ). However, there was  
467 no significant difference between non-primary and primary auditory regions  
468 ( $t(19) = -0.797$ ,  $p = .435$ ; region x hemisphere interaction:  $t(19) = 1.67$ ,  $p =$   
469  $.112$ ). In summary, although there was a clear and fine-grained change  
470 across hierarchical levels in the strength of frequency coding (primary vs. non-  
471 primary auditory cortex, non-primary auditory vs. parietal cortex), such a  
472 change for AM and integrated coding was less fine-grained and only evident  
473 in the higher hierarchical levels (non-primary vs. parietal cortex).

474 Additional univariate analyses were conducted in which we assessed  
475 the strength of activation in each ROI using repeated measures ANOVA (with  
476 frequency and AM as factors). As shown in Figure 3, main effects of  
477 frequency and AM were present in auditory cortical regions but not in parietal  
478 cortex (FDR corrected as before, across 6 ROIs x 2 hemispheres x 3 effects  
479 of interest). No significant interaction between frequency and AM was

480 observed in any of the regions tested (even with an uncorrected threshold).  
 481 This suggests that the integrated coding effects revealed by cvMANOVA are  
 482 inherently multivariate and arise from the pattern (and not strength) of  
 483 multivoxel activity, a point to which we will return in the Discussion.

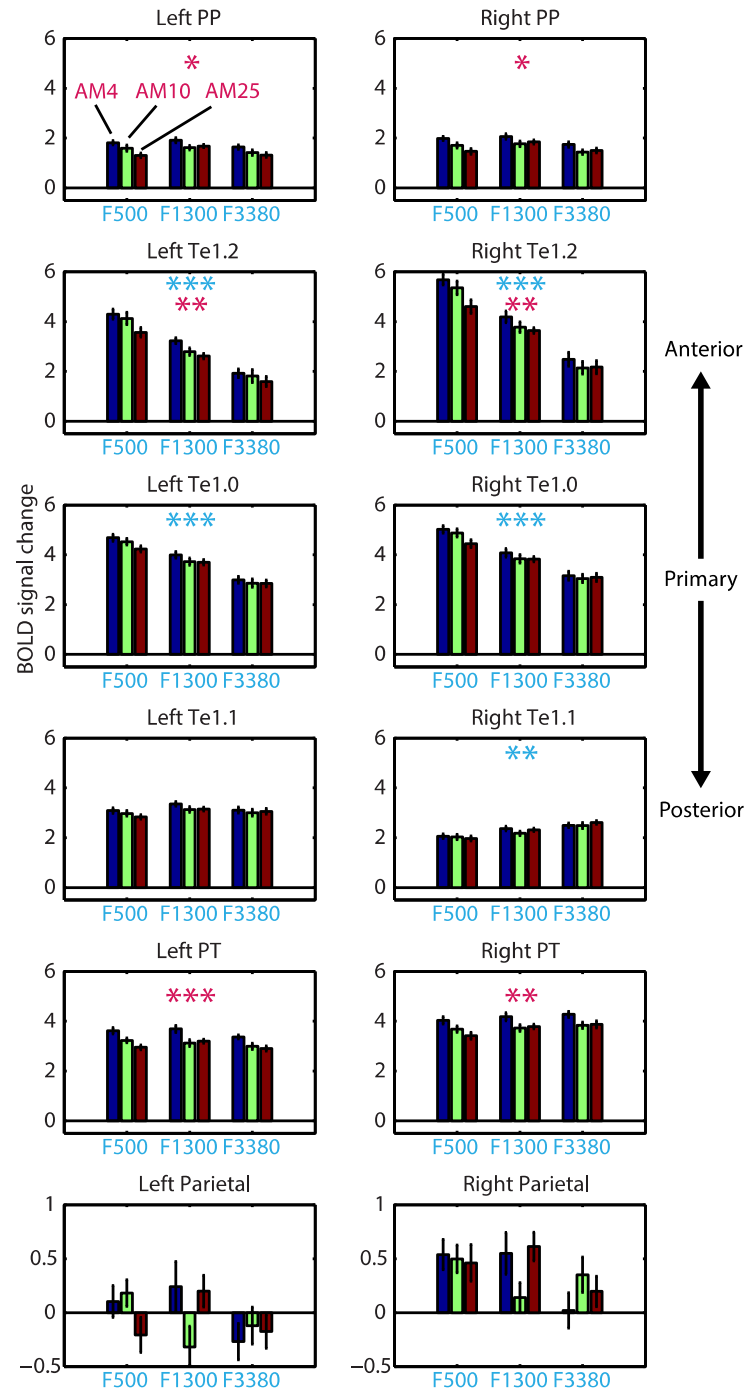

**Figure 3.** Univariate ROI analysis. Data represent the BOLD signal change averaged over the spatial extent of each ROI and across participants. Error bars represent the standard error of the mean. Asterisk symbols indicate a significant main effect of frequency (in cyan) or AM rate (in magenta), FDR corrected for multiple comparisons across contrast, ROI and hemisphere. \*\*\*  $p < .001$ , \*\*  $p < .01$ , \*  $p < .05$ .

## 484 **Multidimensional scaling analysis**

485           Having established the cortical distribution of independent and  
486 integrated codes, we next used classical MDS to further characterize those  
487 codes (Kriegeskorte and Kievit, 2013). In three selected ROIs (right Te1.0,  
488 right PT and left parietal), we computed the pattern distinctness for all pairs of  
489 stimuli and assembled the results into dissimilarity matrices. These ROIs were  
490 chosen as together they fully sample the transition from auditory core to non-  
491 core to parietal cortex and show a mixture of independent and integrated  
492 coding profiles. After averaging the matrices over participants and  
493 thresholding at  $p < .05$  uncorrected (Figure 4A), MDS was performed to  
494 project the multivoxel dissimilarity structure onto a simple two-dimensional  
495 space (Figure 4B). In this visualization, stimuli that are close together are  
496 associated with similar multivoxel activation patterns while stimuli that are far  
497 from each other are associated with dissimilar patterns.

498           In right primary auditory cortex (area Te1.0) and right PT, frequency  
499 and AM features were automatically projected by the MDS solution onto  
500 separate dimensions, despite the method having no information as to the  
501 stimulus features. Frequency was carried by the first MDS dimension (shown  
502 as the x-axis in Figure 4B) while AM was carried by the second dimension (y-  
503 axis). This is consistent with our previous observation of these regions  
504 representing frequency and AM in a largely independent manner. We note  
505 further that the 4 and 10 Hz AM rates (in right Te1.0) and the 10 and 25 Hz  
506 AM rates (in right PT) were closer in MDS space for the middle carrier  
507 frequency (1300 Hz), which may account for the small degree of integrated  
508 coding observed in these regions. However, as establishing the group-level  
509 reliability of MDS solutions is difficult due to the arbitrary rotation induced by  
510 the method (Ejaz et al., 2015), we refrain from drawing strong conclusions  
511 about this latter observation.

512           In contrast to auditory cortex, MDS for the left parietal ROI did not  
513 clearly separate frequency and AM features. Instead, activation patterns in  
514 this region were modulated by particular conjunctions of carrier frequency and  
515 AM rate (e.g. F500AM10 and F3380AM25). This is again consistent with our

516 previous observation that parietal cortex is characterized solely by an  
 517 integrated code.

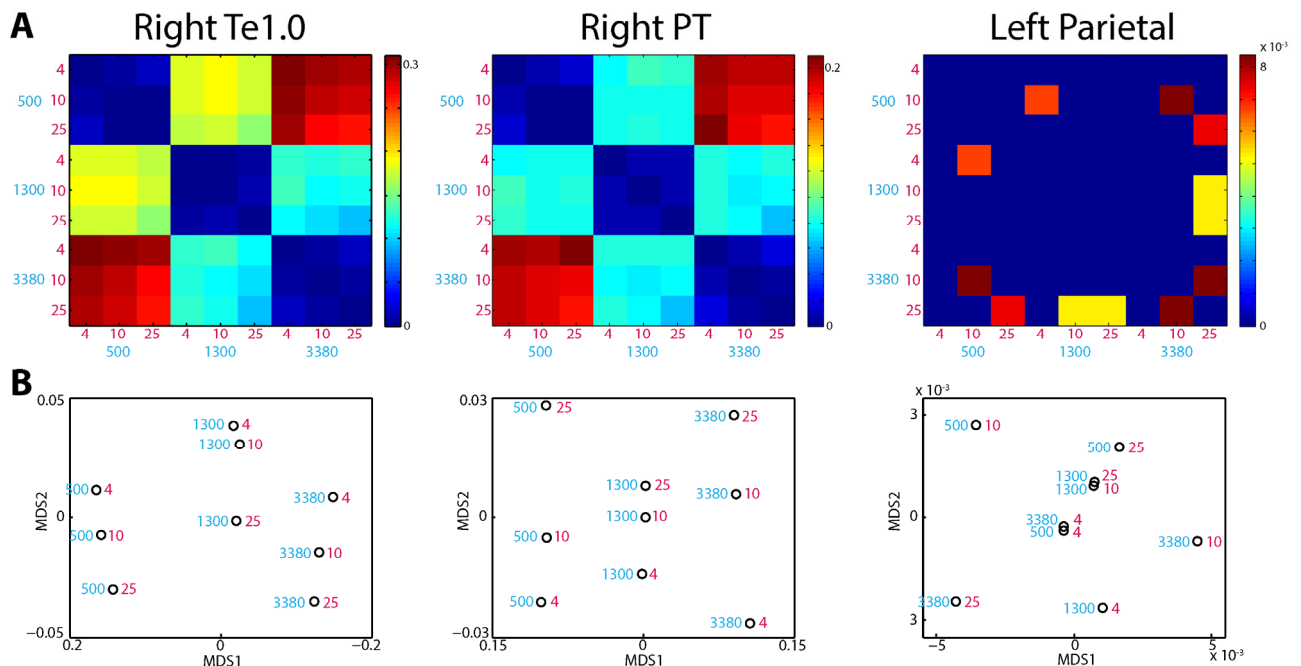

**Figure 4.** Visualizations of multivariate pattern distinctness A) Matrices expressing the multivoxel dissimilarity for all pairs of stimuli, averaged over the searchlight map within each ROI. Warm colors indicate multivoxel patterns that are highly dissimilar while cool colors indicate less dissimilarity. Dissimilarity matrices are shown thresholded at  $p < .05$  (uncorrected). B) MDS solutions for the dissimilarity matrices shown in panel A (first two dimensions plotted only). The cyan number beside each data point indicates the carrier center frequency of the bandpass noise while the magenta number indicates the AM rate.

## Saliency analysis

518 In the visual domain, parietal cortex has repeatedly been implicated in  
 519 the processing of bottom-up saliency (Arcizet et al., 2011; Bogler et al., 2011).  
 520 We therefore asked to what extent the integrated coding effect observed in  
 521 posterior parietal cortex could be explained by between-stimulus differences  
 522 in perceived saliency. In a separate behavioral session, listeners listened to  
 523 all pairwise combinations of the nine sounds and judged which sound in each  
 524 pair was more salient. We then estimated the perceived saliency of each  
 525 sound as the percentage of trials the sound was chosen as more salient  
 526 (shown in Figure 5A as thick black line). Because saliency is related (although  
 527 not identical) to loudness (Liao et al., 2015), we also show for comparison the  
 528 loudness of the stimuli as predicted by the model of Moore et al. 2016 (shown  
 529 in Figure 5A as thick blue line).

530 Repeated measures ANOVA of the saliency judgments, with frequency

531 and AM rate as factors, revealed a significant main effect of frequency  
532 (reflecting higher saliency for increasing frequency;  $F(2,10) = 31.5$ ,  $p < .001$ )  
533 and a significant main effect of AM rate (reflecting higher saliency for the  
534 middle AM rate;  $F(2,10) = 6.34$ ,  $p < .025$ ). However, the interaction between  
535 frequency and AM rate was not significant ( $F(4,20) = .808$ ,  $p = .512$ ). To  
536 directly test whether there was positive evidence for the null effect of no  
537 interaction, we also conducted repeated measures ANOVA as a Bayesian  
538 analysis (Rouder et al., 2016, 2017; Marsman and Wagenmakers, 2017). We  
539 contrasted a model which contained both main effects of frequency and AM  
540 and their interaction, with a null model that had the same structure but lacked  
541 the interaction (both models were assigned a prior probability of 0.5). This  
542 analysis indicated that the null model was 5 times more likely than the  
543 alternative model (Bayes Factor = 5.31). As the integrated coding effect in  
544 parietal cortex is defined by the interaction between frequency and AM, the  
545 absence of an interaction in the saliency judgments is therefore inconsistent  
546 with a saliency-based account of the integrated coding effect in parietal  
547 cortex, or indeed, in any other of the regions in which integrated coding was  
548 observed.

549 As a further test of a saliency-based account, we used representational  
550 similarity analysis (RSA) to relate listeners' saliency judgments to the  
551 observed multivoxel patterns (Kriegeskorte and Kievit, 2013). For each pair of  
552 sounds presented in the saliency judgment task, we pooled saliency  
553 judgments over trials and participants and computed the absolute difference  
554 in the percentage of observations each sound in the pair was chosen as more  
555 salient. From this we assembled a distance matrix quantifying the difference  
556 in saliency between the two sounds of all presented pairs (Figure 5B). This  
557 "saliency distance" matrix provides a more detailed characterization of  
558 between-stimulus differences in saliency than the summary measure  
559 presented in Figure 5A, which we could then correlate with the multivoxel  
560 dissimilarity matrix observed in each searchlight across the cortex of  
561 individual participants. As shown in Figure 5C, the (Fisher-transformed)  
562 Spearman correlation between the saliency and multivoxel dissimilarity  
563 structure was significantly above zero in the superior temporal plane

564 bilaterally but not in parietal cortex (for MNI coordinates, see Table 1). This  
565 pattern was further supported by an ROI analysis (Figure 5D) in which the  
566 Spearman correlation significantly decreased from superior temporal to  
567 parietal cortex ( $F(1,19) = 57.8, p < .001$ ; effects involving hemisphere were  
568 not significant). We further note with interest how this saliency-to-multivoxel  
569 correlation peaked in posteromedial auditory area Te1.1, which clearly differs  
570 to how the independent and integrated coding effects were expressed over  
571 cortical regions (compare Figure 5D with Figure 2B). Nearly identical results  
572 were obtained when using loudness in this ROI analysis (here a loudness  
573 distance matrix was formed by computing the absolute differences in  
574 loudness between the stimuli). This suggests that saliency/loudness can be  
575 reliably dissociated from the independent and integrated coding effects of the  
576 earlier analyses. In summary then, this RSA analysis together with the  
577 absence of interactive influences of frequency and AM on behavioral saliency  
578 judgments suggests that the integrated coding effect we observe cannot be  
579 attributed to saliency/loudness. We will return to this point in the Discussion.



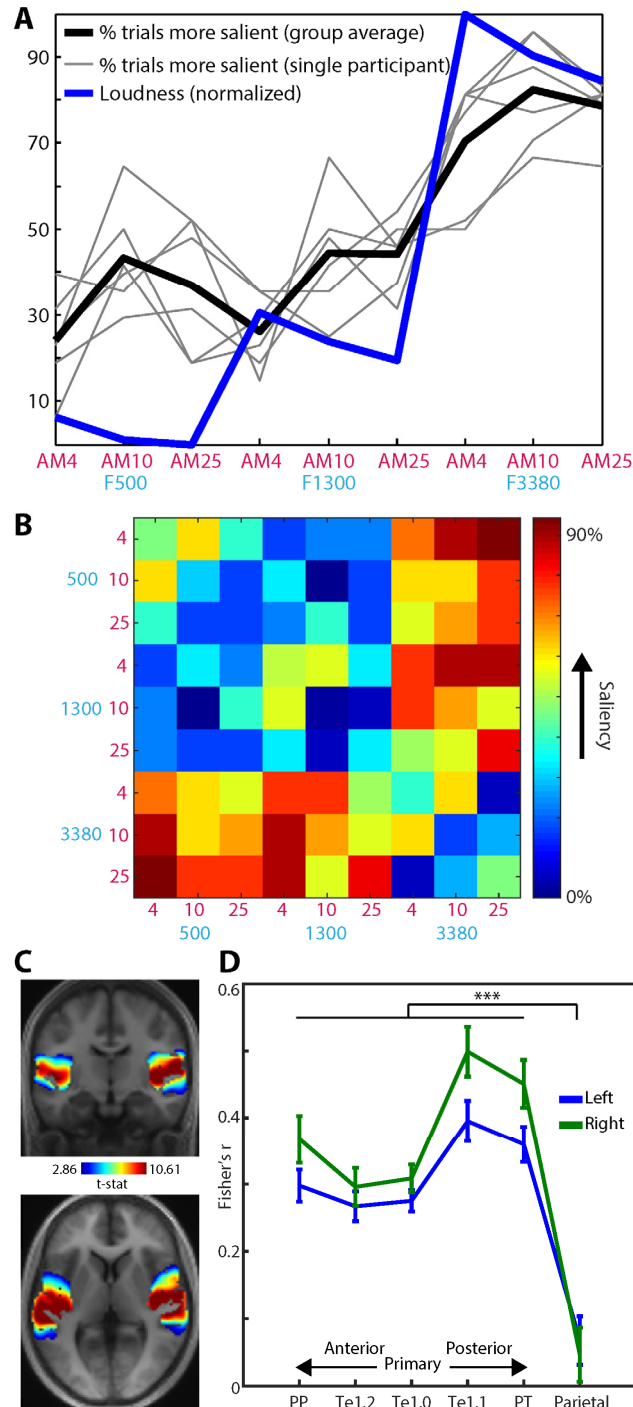

**Figure 5.** Saliency analysis. A) Subjective saliency of the stimuli. The thick black line indicates the group-averaged percentage of trials each stimulus was judged as more salient (than the other stimuli). Light gray lines indicate saliency judgements for individual participants. The thick blue line represents the predicted loudness of the stimuli according to the model of Moore et al. (2016) and normalized to have the same scale as the saliency data (for display purposes only). B) “Saliency distance” matrix expressing the absolute difference in the percentage of observations each sound in a pair was chosen as more salient. C) Whole-cortex multivariate searchlight analysis, showing where the Fisher transformed spearman correlation between the saliency distance matrix in panel B and the multivoxel dissimilarity structure in each searchlight was significantly above zero across participants (thresholded voxelwise at  $p < .005$  and clusterwise at  $p < .05$  FWE corrected for multiple comparisons). D) ROI analysis. Each data point shows the Fisher transformed Spearman correlation, averaged over the searchlight map within each ROI and over participants. Error bars represent the standard error of the mean. Brace and asterisk indicates significant  $p < .001$  F-test comparing the strength of Spearman correlation between auditory and parietal regions.

580

## Discussion

581 In the current study, we manipulated two important acoustic features in  
582 parallel, frequency and AM rate, and determined the extent to which they are  
583 represented by independent versus integrated codes in fMRI multivoxel  
584 patterns. We demonstrate that these spectral and temporal dimensions are  
585 represented largely independently in the superior temporal plane, with only a  
586 weakly integrated component present in right Te1.0, Te1.2 and PT  
587 (amounting to no more than 4% of the frequency effect size and 50% of the  
588 AM rate effect size). In contrast, in a posterior parietal region not classically  
589 considered part of auditory cortex, neural representation is exclusively  
590 integrated albeit weakly.

591

### 592 **Independent representations in the superior temporal plane**

593 Our demonstration of largely independent representations of frequency  
594 and AM rate in the superior temporal plane contrasts with evidence from  
595 animal physiology that suggest highly non-linear representations already at  
596 the level of primary auditory cortex (e.g. deCharms et al., 1998; Nelken et al.,  
597 2003; Wang et al., 2005). While there are many differences between the  
598 current study and this previous work (most obviously, species and recording  
599 technique), our findings may also reflect the specific features that were  
600 manipulated. Specifically, it has been suggested that frequency and AM rate  
601 are fundamental dimensions of sound analysis (Dau et al., 1997; Chi et al.,  
602 2005) and in the auditory cortex are represented as orthogonally-organized  
603 topographic maps (“tonotopy” and “periodotopy”; e.g. Baumann et al., 2015).  
604 Our findings in the superior temporal plane are thus consistent with the notion  
605 of orthogonal maps for frequency and AM features. While previous  
606 electrophysiological (Langner et al., 2009) and fMRI (Baumann et al., 2015)  
607 findings from animals also support this proposal, in humans the evidence is  
608 mixed with some studies showing clear topographic organization (Langner et  
609 al., 1997; Barton et al., 2012; Herdener et al., 2013) but others not (Giraud et  
610 al., 2000; Schönwiesner and Zatorre, 2009; Overath et al., 2012; Leaver and  
611 Rauschecker, 2016). These conflicting findings may be attributed to the small

612 size of auditory cortex and high inter-subject variability in anatomy. In the  
613 current study we overcame these challenges by using a multivariate analysis  
614 method that abstracts away from the precise configuration of voxels.  
615 Importantly, this approach allowed us to directly test and quantify the degree  
616 of representational independence, an approach distinct to the more qualitative  
617 inferences of previous mapping studies.

618         Orthogonal representation of frequency and AM features is also  
619 suggested by component analysis of human fMRI responses to natural  
620 sounds (Norman-Haignere et al., 2015). This work suggests that frequency  
621 and AM features are represented as independent components in partly  
622 overlapping regions of the superior temporal plane. However, this study did  
623 not test for feature interactions between those features, leaving unclear the  
624 relative contributions of independent and integrated representations to neural  
625 responses.

626         Thus, our study provides new evidence that frequency and AM are  
627 orthogonal dimensions of sound analysis. Such independent representation  
628 may support listeners' ability to selectively process information in frequency  
629 versus time. In addition, as noted by Schnupp (2001), an independent coding  
630 scheme will tend to convey more information than a highly-selective  
631 integrated code. This property would be desirable if the role of primary  
632 auditory cortex was to relay information to more specialized feature  
633 conjunction detectors in higher-level regions.

634

### 635 **Integrated representation in posterior parietal cortex**

636         Our imaging of the entire cortex allowed us to probe beyond classically  
637 defined auditory cortex. In this respect, a striking demonstration here is of an  
638 exclusively integrated representation of frequency and AM rate in a left  
639 parietal region, just posterior to the intraparietal sulcus (IPS). This finding is  
640 notable for two reasons. First, it parallels findings from the visual domain in  
641 which parietal cortex (in particular the IPS) shows increased fMRI responses  
642 in feature conjunction versus single feature tasks (Donner et al., 2002;  
643 Shafritz et al., 2002; see also Baumgartner et al., 2013 for a similar finding  
644 using multivariate methods), with damage to this region leading to feature

645 binding deficits (Humphreys et al., 2000). Second, BOLD activation in the IPS  
646 has been shown to systematically vary in auditory bi-stability (Cusack, 2005)  
647 and figure-ground paradigms (Teki et al., 2011, 2016). Indeed, the peak  
648 locations of the posterior parietal effects reported by these latter studies fall  
649 inside the cluster reported here. In both these auditory paradigms, perceptual  
650 outcomes are critically dependent on the way in which information across  
651 multiple features (frequency and time) is combined. Thus, the integrated  
652 representation for frequency and AM we observe here in posterior parietal  
653 cortex is consistent with previous work suggesting a role for the IPS in feature  
654 integration and the structuring of acoustic input, possibly alongside other  
655 parietal regions specialized for visual information (for further discussion, see  
656 Cusack, 2005). However, our study goes beyond previous work that  
657 measured overall regional differences in fMRI or MEG signal amplitude by  
658 more directly probing representational content in multivoxel patterns, an  
659 approach which is less susceptible to confounding factors such as task  
660 difficulty (Baumgartner et al., 2013).

661         Because of previous findings from the visual domain implicating  
662 parietal cortex in bottom-up saliency (Arcizet et al., 2011; Bogler et al., 2011),  
663 we also asked a separate group of listeners to rate the subjective saliency of  
664 the stimuli. While the sounds clearly differed in their subjective saliency, we  
665 found that influences of frequency and AM on the saliency ratings combined  
666 independently without evidence for an interaction, an observation inconsistent  
667 with a saliency based account. Moreover, when using RSA to relate saliency  
668 judgments to the dissimilarity structure of the multivoxel patterns, we found  
669 that saliency did not correlate with multivoxel patterns in parietal cortex.  
670 Rather, the effect of saliency was confined to superior temporal plane regions  
671 with a peak in posteromedial auditory area Te1.1, which is reminiscent of  
672 findings by Behler and Uppenkamp (2016) who reported correlates of  
673 loudness in this region (see Liao et al., 2015 for the close relationship  
674 between loudness and saliency). Thus, the results from this saliency analysis  
675 suggest that the integrated coding effect we observe cannot be attributed to  
676 bottom-up saliency.

677           Related to the issue of saliency, we also consider the possibility that  
678 the integrated coding profile we observe in parietal cortex was in part a  
679 consequence of listeners' task. In our study, listeners performed an  
680 attentionally undemanding task that did not require explicit integration of  
681 frequency and AM features: detecting the target white-noise interruptions  
682 could in principle be based on changes in either the amplitude or spectral  
683 profiles alone. Despite this, one might argue that participants nevertheless  
684 detected the noise interruptions by attending to changes in both temporal and  
685 spectral content, in turn contributing to the integrated coding effect we  
686 observe. Indeed, as discussed below, attention has long been proposed to  
687 mediate feature integration (Treisman and Gelade, 1980). However, we think  
688 that this is unlikely as an explanation for the current findings. The interaction  
689 between frequency and AM rate in parietal cortex resulted from differences in  
690 the multivoxel patterns evoked by our stimuli (while the task was fixed  
691 throughout). Thus, even if listeners monitored both spectral and temporal  
692 content to detect the target interruptions, it is unclear how this would have  
693 preferentially biased listeners' attention towards certain feature conjunctions.  
694 This is because the targets were temporally unmodulated and spectrally wide-  
695 band and therefore "neutral" with respect to the nine feature conjunctions of  
696 the stimuli.

697           A key assumption in our approach to distinguishing independent and  
698 integrated representations is a linear relationship between underlying neural  
699 activity and the measured fMRI signal (Kornysheva and Diedrichsen, 2014;  
700 Erez et al., 2015). Our univariate analysis shows that the mean signal  
701 amplitude in the posterior parietal region did not differ between stimuli, neither  
702 in terms of main effects nor in the interaction between frequency and AM  
703 rate. This suggests that our experimental manipulations in this region did not  
704 evoke sufficiently large changes in mean signal to saturate the fMRI response  
705 and produce non-linear signal changes that could be misinterpreted as an  
706 integrated representation.

707           The integration of multiple feature representations is critical for building  
708 a cohesive perception of the auditory scene. However, even in parietal cortex,

709 the effect size for integrated coding was small in comparison with that  
710 observed for independent coding in the superior temporal plane. Why then do  
711 we observe only weak integration of frequency and AM rate? As discussed  
712 above, frequency and AM may be privileged dimensions of sound analysis  
713 that are separable in a way that other dimensions are not. Our results may  
714 also be attributed to listeners performing an attentionally undemanding task  
715 that did not require explicit integration of frequency and AM features. It has  
716 been suggested that while individual features are detected automatically,  
717 feature integration is a computationally demanding process requiring focused  
718 attention (Treisman and Gelade, 1980; Shamma et al., 2011). Thus, the  
719 absence of focused attention to feature conjunctions could explain the weak  
720 integration we observe. Future work, using manipulations of attention, will be  
721 required to test this proposal.

722

## References

723 Allefeld C, Haynes JD (2014) Searchlight-based multi-voxel pattern analysis  
724 of fMRI by cross-validated MANOVA. *Neuroimage* 89:345–357.

725 Allen EJ, Burton PC, Olman CA, Oxenham AJ (2017) Representations of  
726 Pitch and Timbre Variation in Human Auditory Cortex. *J Neurosci*  
727 37:1284–1293.

728 Arcizet F, Mirpour K, Bisley JW (2011) A pure salience response in posterior  
729 parietal cortex. *Cereb Cortex* 21:2498–2506.

730 Ashby FG, Townsend JT (1986) Varieties of perceptual independence.  
731 *Psychol Rev* 93:154–179.

732 Atencio CA, Sharpee TO, Schreiner CE (2009) Hierarchical computation in  
733 the canonical auditory cortical circuit. *Proc Natl Acad Sci U S A*  
734 106:21894–21899.

735 Barton B, Venezia JH, Saberi K, Hickok G, Brewer A a (2012) Orthogonal  
736 acoustic dimensions define auditory field maps in human cortex. *Proc*  
737 *Natl Acad Sci U S A* 109:20738–20743.

- 738 Baumann S, Joly O, Rees A, Petkov CI, Sun L, Thiele A, Griffiths TD (2015)  
739 The topography of frequency and time representation in primate auditory  
740 cortices. *Elife* 2015:1–15.
- 741 Baumgartner F, Hanke M, Geringswald F, Zinke W, Speck O, Pollmann S  
742 (2013) Evidence for feature binding in the superior parietal lobule.  
743 *Neuroimage* 68:173–180.
- 744 Behler O, Uppenkamp S (2016) The representation of level and loudness in  
745 the central auditory system for unilateral stimulation. *Neuroimage*  
746 139:176–188.
- 747 Bizley JK, Cohen YE (2013) The what, where and how of auditory-object  
748 perception. *Nat Rev Neurosci* 14:693–707.
- 749 Bizley JK, Walker KMM, Silverman BW, King AJ, Schnupp JWH (2009)  
750 Interdependent encoding of pitch, timbre, and spatial location in auditory  
751 cortex. *J Neurosci* 29:2064–2075.
- 752 Bogler C, Bode S, Haynes JD (2011) Decoding successive computational  
753 stages of saliency processing. *Curr Biol* 21:1667–1671.
- 754 Chi T, Ru P, Shamma SA (2005) Multiresolution spectrotemporal analysis of  
755 complex sounds. *J Acoust Soc Am* 118:887–906.
- 756 Christianson GB, Sahani M, Linden JF (2008) The consequences of response  
757 nonlinearities for interpretation of spectrotemporal receptive fields. *J*  
758 *Neurosci* 28:446–455.
- 759 Christophel TB, Allefeld C, Endisch C, Haynes J (2017) View-Independent  
760 Working Memory Representations of Artificial Shapes in Prefrontal and  
761 Posterior Regions of the Human Brain. *Cereb Cortex*:1–16.
- 762 Christophel TB, Iamshchinina P, Yan C, Allefeld C, Haynes J-D (2018)  
763 Cortical specialization for attended versus unattended working memory.  
764 *Nat Neurosci*.
- 765 Cusack R (2005) The intraparietal sulcus and perceptual organization. *J Cogn*

- 766           Neurosci 17:641–651.
- 767   Dau T, Kollmeier B, Kohlrausch A (1997) Modeling auditory processing of  
768           amplitude modulation. II. Spectral and temporal integration. J Acoust Soc  
769           Am 102:2906–2919.
- 770   Davis MH, Johnsrude IS (2003) Hierarchical processing in spoken language  
771           comprehension. J Neurosci 23:3423–3431.
- 772   deCharms RC, Blake DT, Merzenich MM (1998) Optimizing sound features  
773           for cortical neurons. Science 280:1439–1443.
- 774   Di Lollo V (2012) The feature-binding problem is an ill-posed problem. Trends  
775           Cogn Sci 16:317–321.
- 776   Dijkstra N, Bosch SE, van Gerven MAJ (2017) Vividness of Visual Imagery  
777           Depends on the Neural Overlap with Perception in Visual Areas. J  
778           Neurosci 37:1367–1373.
- 779   Donner TH, Kettermann A, Diesch E, Ostendorf F, Villringer A, Brandt S a  
780           (2002) Visual feature and conjunction searches of equal difficulty engage  
781           only partially overlapping frontoparietal networks. Neuroimage 15:16–25.
- 782   Ejaz N, Hamada M, Diedrichsen J (2015) Hand use predicts the structure of  
783           representations in sensorimotor cortex. Nat Neurosci 18:1034–1040.
- 784   Erez J, Cusack R, Kendall W, Barense MD (2015) Conjunctive Coding of  
785           Complex Object Features. Cereb Cortex:1–12.
- 786   Esterman M, Tamber-Rosenau BJ, Chiu YC, Yantis S (2010) Avoiding non-  
787           independence in fMRI data analysis: Leave one subject out. Neuroimage  
788           50:572–576.
- 789   Formisano E, De Martino F, Bonte M, Goebel R (2008) “Who” is saying  
790           “what”? Brain-based decoding of human voice and speech. Science  
791           322:970–973.
- 792   Formisano E, Kim D-S, Di Salle F, van de Moortele P-F, Ugurbil K, Goebel R



- 793 (2003) Mirror-Symmetric Tonotopic Maps in Human Primary Auditory  
794 Cortex. *Neuron* 40:859–869.
- 795 Genovese CR, Lazar N a, Nichols T (2002) Thresholding of statistical maps in  
796 functional neuroimaging using the false discovery rate. *Neuroimage*  
797 15:870–878.
- 798 Giordano BL, McAdams S, Zatorre RJ, Kriegeskorte N, Belin P (2013)  
799 Abstract encoding of auditory objects in cortical activity patterns. *Cereb*  
800 *Cortex* 23:2025–2037.
- 801 Giraud A, Lorenzi C, Ashburner J, Wable J, Johnsrude I, Frackowiak R,  
802 Kleinschmidt A, Wolfgang J, Lorenzi C, Ashburner J, Johnsrude I,  
803 Frackowiak R (2000) Representation of the temporal envelope of sounds  
804 in the human brain. *J Neurophysiol* 84:1588–1598.
- 805 Guggenmos M, Wilbertz G, Hebart MN, Sterzer P (2016) Mesolimbic  
806 confidence signals guide perceptual learning in the absence of external  
807 feedback. *Elife* 5:1–19.
- 808 Haynes J-D (2015) A Primer on Pattern-Based Approaches to fMRI:  
809 Principles, Pitfalls, and Perspectives. *Neuron* 87:257–270.
- 810 Herdener M, Esposito F, Scheffler K, Schneider P, Logothetis NK, Uludag K,  
811 Kayser C (2013) Spatial representations of temporal and spectral sound  
812 cues in human auditory cortex. *Cortex* 49:2822–2833.
- 813 Humphreys GW, Cinel C, Wolfe J, Olson A, Klempen N (2000) Fractionating  
814 the binding process: Neuropsychological evidence distinguishing binding  
815 of form from binding of surface features. *Vision Res* 40:1569–1596.
- 816 Hutton C, Josephs O, Stadler J, Featherstone E, Reid A, Speck O, Bernarding  
817 J, Weiskopf N (2011) The impact of physiological noise correction on  
818 fMRI at 7T. *Neuroimage* 57:101–112.
- 819 Kornysheva K, Diedrichsen J (2014) Human premotor areas parse sequences  
820 into their spatial and temporal features. *Elife* 3:e03043.

- 821 Kriegeskorte N, Goebel R, Bandettini P (2006) Information-based functional  
822 brain mapping. *Proc Natl Acad Sci U S A* 103:3863–3868.
- 823 Kriegeskorte N, Kievit RA (2013) Representational geometry: integrating  
824 cognition, computation, and the brain. *Trends Cogn Sci* 17:401–412.
- 825 Kriegeskorte N, Simmons WK, Bellgowan PSF, Baker CI (2009) Circular  
826 analysis in systems neuroscience: the dangers of double dipping. *Nat*  
827 *Neurosci* 12:535–540.
- 828 Kumar S, Stephan KE, Warren JD, Friston KJ, Griffiths TD (2007) Hierarchical  
829 processing of auditory objects in humans. *PLoS Comput Biol* 3:0977–  
830 0985.
- 831 Langner G, Dinse HR, Godde B (2009) A map of periodicity orthogonal to  
832 frequency representation in the cat auditory cortex. *Front Integr Neurosci*  
833 3:27.
- 834 Langner G, Sams M, Heil P, Schulze H (1997) Frequency and periodicity are  
835 represented in orthogonal maps in the human auditory cortex: Evidence  
836 from magnetoencephalography. *J Comp Physiol - A Sensory, Neural,*  
837 *Behav Physiol* 181:665–676.
- 838 Leaver AM, Rauschecker JP (2010) Cortical representation of natural  
839 complex sounds: effects of acoustic features and auditory object  
840 category. *J Neurosci* 30:7604–7612.
- 841 Leaver AM, Rauschecker JP (2016) Functional Topography of Human  
842 Auditory Cortex. *J Neurosci* 36:1416–1428.
- 843 Liao H-I, Kidani S, Yoneya M, Kashino M, Furukawa S (2015)  
844 Correspondences among pupillary dilation response, subjective salience  
845 of sounds, and loudness. *Psychon Bull Rev.*
- 846 Linke AC, Cusack R (2015) Flexible Information Coding in Human Auditory  
847 Cortex during Perception, Imagery, and STM of Complex Sounds. *J Cogn*  
848 *Neurosci* 27:1322–1333.

- 849 Marsman M, Wagenmakers EJ (2017) Bayesian benefits with JASP. *Eur J*  
850 *Dev Psychol* 14:545–555.
- 851 Moore B (2003) *An Introduction to the Psychology of Hearing, Fifth Edition.*  
852 Academic Press.
- 853 Moore BC, Glasberg BR (1983) Suggested formulae for calculating auditory-  
854 filter bandwidths and excitation patterns. *J Acoust Soc Am* 74:750–753.
- 855 Moore BCJ, Glasberg BR, Varathanathan A (2016) A Loudness Model for  
856 Time-Varying Sounds Incorporating Binaural Inhibition. *Trends Hear*  
857 20:1–16.
- 858 Nelken I, Fishbach A, Las L, Ulanovsky N, Farkas D (2003) Primary auditory  
859 cortex of cats: feature detection or something else? *Biol Cybern* 89:397–  
860 406.
- 861 Nichols TE, Holmes AP (2002) Nonparametric permutation tests for functional  
862 neuroimaging: a primer with examples. *Hum Brain Mapp* 15:1–25.
- 863 Norman-Haignere S, Kanwisher NG, McDermott JH (2015) Distinct Cortical  
864 Pathways for Music and Speech Revealed by Hypothesis-Free Voxel  
865 Decomposition. *Neuron* 88:1281–1296.
- 866 Overath T, McDermott JH, Zarate JM, Poeppel D (2015) The cortical analysis  
867 of speech-specific temporal structure revealed by responses to sound  
868 quilts. *Nat Neurosci* 18.
- 869 Overath T, Zhang Y, Sanes DH, Poeppel D (2012) Sensitivity to temporal  
870 modulation rate and spectral bandwidth in the human auditory system :  
871 fMRI evidence. :2042–2056.
- 872 Petsas T, Harrison J, Kashino M, Furukawa S, Chait M (2016) The effect of  
873 distraction on change detection in crowded acoustic scenes. *Hear Res*  
874 341:179–189.
- 875 Plack CJ, Moore BC (1990) Temporal window shape as a function of  
876 frequency and level. *J Acoust Soc Am* 87:2178–2187.

- 877 Rauschecker JP, Tian B (2000) Mechanisms and streams for processing of  
878 “what” and “where” in auditory cortex. *Proc Natl Acad Sci U S A*  
879 97:11800–11806.
- 880 Roberts B, Summers RJ, Bailey PJ (2011) The intelligibility of noise-vocoded  
881 speech: spectral information available from across-channel comparison  
882 of amplitude envelopes. *Proc Biol Sci* 278:1595–1600.
- 883 Rouder JN, Engelhardt CR, McCabe S, Morey RD (2016) Model comparison  
884 in ANOVA. *Psychon Bull Rev* 23:1779–1786.
- 885 Rouder JN, Morey RD, Verhagen J, Swagman AR, Wagenmakers E-J (2017)  
886 Bayesian analysis of factorial designs. *Psychol Methods* 22:304–321.
- 887 Sadagopan S, Wang X (2009) Nonlinear Spectrotemporal Interactions  
888 Underlying Selectivity for Complex Sounds in Auditory Cortex. *J Neurosci*  
889 29:11192–11202.
- 890 Schnupp JW, Mrsic-Flogel TD, King a J (2001) Linear processing of spatial  
891 cues in primary auditory cortex. *Nature* 414:200–204.
- 892 Schönwiesner M, Zatorre RJ (2009) Spectro-temporal modulation transfer  
893 function of single voxels in the human auditory cortex measured with  
894 high-resolution fMRI. *Proc Natl Acad Sci U S A* 106:14611–14616.
- 895 Shafritz KM, Gore JC, Marois R (2002) The role of the parietal cortex in visual  
896 feature binding. *Proc Natl Acad Sci U S A* 99:10917–10922.
- 897 Shamma SA, Elhilali M, Micheyl C (2011) Temporal coherence and attention  
898 in auditory scene analysis. *Trends Neurosci* 34:114–123.
- 899 Shannon R V., Zeng F-G, Kamath V, Wygonski J, Ekelid M (1995) Speech  
900 Recognition with Primarily Temporal Cues. *Science* (80- ) 270:303–304.
- 901 Simanova I, Hagoort P, Oostenveld R, Van Gerven MAJ (2014) Modality-  
902 independent decoding of semantic information from the human brain.  
903 *Cereb Cortex* 24:426–434.

- 904 Sloas DC, Zhuo R, Xue H, Chambers AR, Kolaczyk E, Polley DB, Sen K  
905 (2016) Interactions across Multiple Stimulus Dimensions in Primary  
906 Auditory Cortex. *eNeuro* 3:1–7.
- 907 Soto FA, Vucovich LE, Ashby FG (2018) Linking signal detection theory and  
908 encoding models to reveal independent neural representations from  
909 neuroimaging data Diedrichsen J, ed. *PLOS Comput Biol* 14:e1006470.
- 910 Staeren N, Renvall H, De Martino F, Goebel R, Formisano E (2009) Sound  
911 Categories Are Represented as Distributed Patterns in the Human  
912 Auditory Cortex. *Curr Biol* 19:498–502.
- 913 Teki S, Barascud N, Picard S, Payne C, Griffiths TD, Chait M (2016) Neural  
914 Correlates of Auditory Figure-Ground Segregation Based on Temporal  
915 Coherence. *Cereb Cortex* 26:3669–3680.
- 916 Teki S, Chait M, Kumar S, von Kriegstein K, Griffiths TD (2011) Brain bases  
917 for auditory stimulus-driven figure-ground segregation. *J Neurosci*  
918 31:164–171.
- 919 Tong F, Pratte MS (2012) Decoding patterns of human brain activity. *Annu*  
920 *Rev Psychol* 63:483–509.
- 921 Treisman AM, Gelade G (1980) A feature-integration theory of attention. *Cogn*  
922 *Psychol* 12:97–136.
- 923 Walther A, Nili H, Ejaz N, Alink A, Kriegeskorte N, Diedrichsen J (2016)  
924 Reliability of dissimilarity measures for multi-voxel pattern analysis.  
925 *Neuroimage* 137:188–200.
- 926 Wang X, Lu T, Snider RK, Liang L (2005) Sustained firing in auditory cortex  
927 evoked by preferred stimuli. *Nature* 435:341–346.
- 928 Zatorre RJ, Bouffard M, Belin P (2004) Sensitivity to auditory object features  
929 in human temporal neocortex. *J Neurosci* 24:3637–3642.
- 930
